# Supplementary material for: Participatory science for coastal water quality: freshwater plume mapping and volunteer retention in a randomized informational intervention
Source: Royal Society of Chemistry journal article supplement (doi:10.1039/c9em00571d), 2020-01-01
Supplement: c9em00571d6.pdf [file c9em00571d6.pdf]

# Mid-project Survey - DR

---

## Start of Block: Introductory information

Q1.1 Dear Stanford Beach Project Volunteer, We are so grateful to you for helping make this project possible! Now that we are about halfway through our sampling process, we would like to ask you for feedback to learn what is going well, what has been difficult, and how we can make this project more successful. Completing this survey should take about 10 minutes. Please consider this a crucial element of your participation in this project. Thank you very much for your cooperation!

---

Q1.2

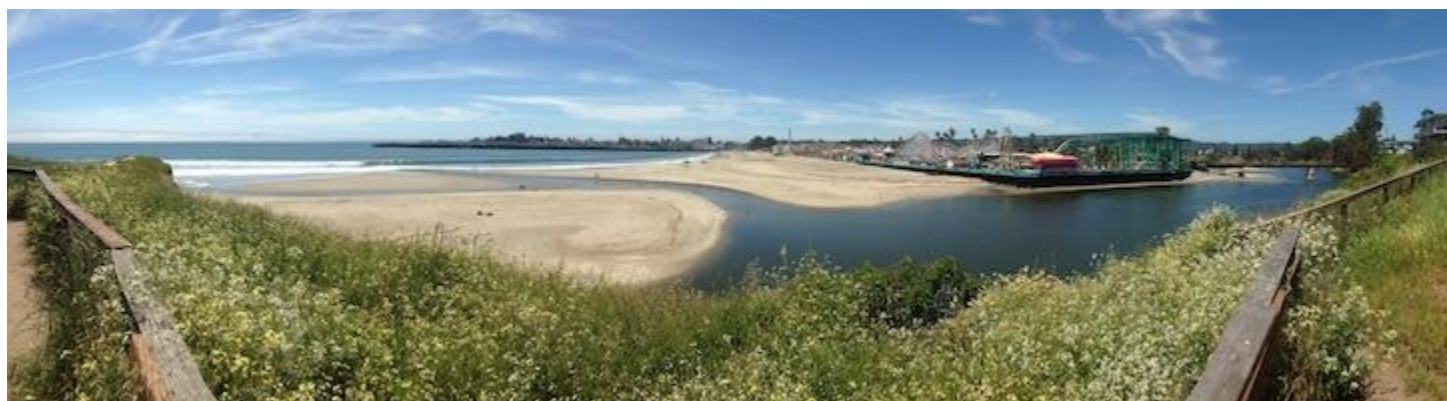

## End of Block: Introductory information

---

## Start of Block: Participant identification

Q2.1 You must be 18 years old or older to participate in this project. What is your age?

- Under 18 (1)
- 18 or older (2)

*Skip To: End of Survey If You must be 18 years old or older to participate in this project. What is your age? = Under 18*

---

Q2.2 What is your first name?

---

Q2.3 What is your last name?

---

Q2.4 At which beach are you assigned to collect samples for this project?

- Linda Mar Beach (1)
- Main Beach (2)
- Seabright Beach (3)

End of Block: Participant identification

---

Start of Block: Participation difficulties

**Q3.1 First, we would like to learn about any issues that have made sampling difficult for you.**

---

Q3.2 Which of the following factors, if any, have caused you to miss one or more weeks of sampling? Please choose all that apply.

None - I have conducted sampling every week. (1)

I was out of town. (2)

I was in town but too busy. (3)

The weather was bad. (4)

I was ill. (5)

Collecting samples is physically challenging. (6)

I have lost interest in the project. (7)

Other (please specify): (8) \_\_\_\_\_

-----

Q3.3

Has there been any day that you went sampling but were unable to complete all the sampling tasks for that trip?

As a reminder, sampling tasks include: taking at least 5 salinity measurements, 5 color measurements, and 5 GPS locations, and dropping off a water sample and data sheet at a drop-off location.

- No, I completed all sampling tasks each time I went sampling. (6)
  - Yes, I could not complete all tasks due to GPS/phone malfunction. (1)
  - Yes, I could not complete all tasks due to bad weather. (2)
  - Yes, I could not complete all tasks because sampling was physically challenging. (3)
  - Yes, I could not complete all tasks because I did not have enough time. (4)
  - Yes, I could not complete all tasks for another reason (please specify): (5)
- 

-----

Q3.4 Have you had any difficulty with dropping off samples at the designated locations?

- Yes (5)
  - No (6)
- 

*Display This Question:*

*If Have you had any difficulty with dropping off samples at the designated locations? = Yes*

Q3.5 Please describe the difficulty you have had with dropping off samples.

---

Q3.6 Please describe any remaining questions you have about how to collect samples for this project.

---

End of Block: Participation difficulties

---

Start of Block: Participation experience

**Q4.1 Next, we would like to learn about your experience with participating in this project thus far.**

**For each of the following statements, please indicate how strongly you agree or disagree, focusing on your experience as a participant in the Stanford Beach Project.**

-----

Q4.2

By participating in this project, I feel I have done something for a cause I believe in.

- Strongly disagree (1)
  - Somewhat disagree (2)
  - Neither agree nor disagree (3)
  - Somewhat agree (4)
  - Strongly agree (5)
-

Q4.3

By participating in this project, I have contributed to a worthwhile effort.

- Strongly disagree (1)
  - Somewhat disagree (2)
  - Neither agree nor disagree (3)
  - Somewhat agree (4)
  - Strongly agree (5)
- 

Q4.4 By participating in this project, I have contributed to protecting coastal water quality.

- Strongly disagree (1)
  - Somewhat disagree (3)
  - Neither agree nor disagree (4)
  - Somewhat agree (5)
  - Strongly agree (7)
-

Q4.5 By participating in this project, I have gained a better understanding of beach water quality issues.

- Strongly disagree (1)
  - Somewhat disagree (2)
  - Neither agree nor disagree (3)
  - Somewhat agree (4)
  - Strongly agree (5)
- 

Q4.6

By participating in this project, I have gained skills in making water quality measurements.

- Strongly disagree (1)
  - Somewhat disagree (2)
  - Neither agree nor disagree (3)
  - Somewhat agree (4)
  - Strongly agree (5)
-

Q4.7 By participating in this project, I have learned something new about how rivers and creeks impact beach water quality.

- Strongly disagree (1)
  - Somewhat disagree (2)
  - Neither agree nor disagree (3)
  - Somewhat agree (4)
  - Strongly agree (5)
- 

Q4.8 Just a few more statements about your experience with this project.

Please indicate how strongly you agree or disagree with each of the following statements about your participation in this project thus far.

---

Q4.9

Participating in this project has been a good activity to do with my children.

- Strongly disagree (1)
  - Somewhat disagree (2)
  - Neither agree nor disagree (3)
  - Somewhat agree (4)
  - Strongly agree (5)
  - Not applicable to my participation in this study (6)
-



Q4.10

Participating in this project has been an opportunity to spend time with people I care about.

- Strongly disagree (1)
  - Somewhat disagree (2)
  - Neither agree nor disagree (3)
  - Somewhat agree (4)
  - Strongly agree (5)
- 

Q4.11

Participating in this project has been enjoyable.

- Strongly disagree (1)
  - Somewhat disagree (2)
  - Neither agree nor disagree (3)
  - Somewhat agree (4)
  - Strongly agree (5)
-

Q4.12

Participating in this project has enabled me to meet people with interests similar to mine.

- Strongly disagree (1)
  - Somewhat disagree (2)
  - Neither agree nor disagree (3)
  - Somewhat agree (4)
  - Strongly agree (5)
- 

Q4.13 Participating in this project has provided social time.

- Strongly disagree (1)
  - Somewhat disagree (2)
  - Neither agree nor disagree (3)
  - Somewhat agree (4)
  - Strongly agree (5)
-

Q4.14 Volunteering with this project has strengthened my professional resume.

- Strongly disagree (1)
- Somewhat disagree (2)
- Neither agree nor disagree (3)
- Somewhat agree (4)
- Strongly agree (5)

End of Block: Participation experience

---

Start of Block: Water quality rating

Q5.1 **Almost done!**

---

Q5.2 How would you rate the water quality at [\\${Q2.4/ChoiceGroup/SelectedChoices}](#), ranging from 'Not good' to 'Very good'?

- Not good (1)
  - Moderately good (2)
  - Very good (3)
-

Q5.3

Were you aware that our project team has emailed to participants 3 reports summarizing salinity measurements, as well as bacteria and flow data?

Yes (1)

No (2)

---

*Display This Question:*

*If Were you aware that our project team has emailed to participants 3 reports summarizing salinity m... = Yes*

Q5.4

How many of these data reports have you looked at?

None (1)

1 (2)

2 (3)

3 (4)

End of Block: Water quality rating

---

Start of Block: Project logistics

Q6.1

**Last set of questions! We'd like to hear about your experience with sampling logistics, and any other feedback you have for us.**

---

Q6.2

So far, have you had to pay for parking to conduct sampling at the beach for this project?

- Yes, usually or always (1)
  - Yes, sometimes (2)
  - No (3)
- 

Q6.3

So far, with whom have you usually collected samples for this project?

- No one - I have collected samples on my own (1)
  - With one or more friends (2)
  - With family members who are at least 18 years of age (3)
  - With family members younger than 18 years of age (4)
  - Other (please specify): (5) \_\_\_\_\_
-

Q6.4

In general, how physically challenging has it been for you to collect water samples?

- Not challenging at all (1)
  - Mildly challenging (2)
  - Moderately challenging (3)
  - Very challenging (4)
- 

Q6.5

Each time you have gone sampling, about how much time have you spent traveling to and from [\\${Q2.4/ChoiceGroup/SelectedChoices}](#) that you would not otherwise have spent traveling to and from [\\${Q2.4/ChoiceGroup/SelectedChoices}](#)?

- 0-14 minutes (1)
- 15-29 minutes (2)
- 30-44 minutes (3)
- 45-59 minutes (4)
- 1 hour or more (5)

End of Block: Project logistics

---
