# Supplementary material for: Participatory science for coastal water quality: freshwater plume mapping and volunteer retention in a randomized informational intervention
Source: Royal Society of Chemistry journal article supplement (doi:10.1039/c9em00571d), 2020-01-01
Supplement: c9em00571d8.pdf [file c9em00571d8.pdf]

# Post-project Survey - DR

---

## Start of Block: Introductory information

Q1.1 Dear Stanford Beach Project Volunteer, Thank you so much for helping to make this project possible! Now that you have completed your sampling assignment, we would like to hear about your experience as a volunteer. We will use this feedback to improve how we organize future projects that involve community members like you, so we hope you will give us your honest opinions.

Completing this survey should take about 10 minutes. Please consider this to be a critical element of your role in making this project successful. Thank you very much for your cooperation!

---

Q1.2

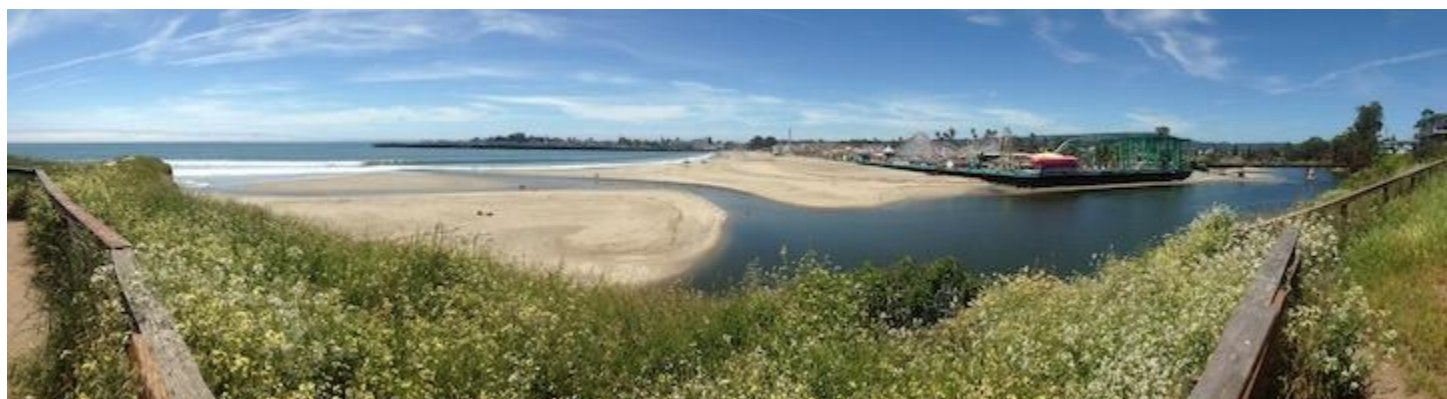

## End of Block: Introductory information

---

## Start of Block: Participant identification

Q2.1 You must be 18 years old or older to participate in this project. What is your age?

- Under 18 (1)
- 18 or older (2)

*Skip To: End of Survey If You must be 18 years old or older to participate in this project. What is your age? = Under 18*

---

Q2.2 What is your first name?

---

---

Q2.3 What is your last name?

---

---

Q2.4 At which beach were you assigned to collect samples for this project?

- Linda Mar Beach (1)
- Main Beach (2)
- Seabright Beach (3)

End of Block: Participant identification

---

Start of Block: Project logistics

Q3.1

**First, we want to learn about your experience with different logistical aspects of the project.**

---

Q3.2

Did you have to pay for parking to conduct sampling at the beach for this project?

- Yes, usually or always (1)
  - Yes, sometimes (2)
  - No (3)
- 

Q3.3

With whom did you usually collect samples for this project?

- No one - I collected samples on my own (1)
  - With one or more friends (2)
  - With family members who are at least 18 years of age (3)
  - With family members younger than 18 years of age (4)
  - Other (please specify): (5) \_\_\_\_\_
- 

Q3.4 If you were to participate in another beach project similar to this one, would you prefer to record and submit data using a paper data sheet, as we did in this project, or using a digital form in a smartphone app?

- Prefer to use a paper data sheet (1)
  - Prefer to use a digital form in a smartphone app (2)
-

Q3.5

Overall, how physically challenging was it for you to collect water samples for this project?

- Not challenging at all (1)
  - Mildly challenging (2)
  - Moderately challenging (3)
  - Very challenging (4)
- 

Q3.6

Each time you went sampling, about how much time did you spend traveling to and from [\\${Q2.4/ChoiceGroup/SelectedChoices}](#) that you would not otherwise have spent traveling to and from [\\${Q2.4/ChoiceGroup/SelectedChoices}](#)?

- 0-14 minutes (1)
- 15-29 minutes (2)
- 30-44 minutes (3)
- 45-59 minutes (4)
- 1 hour or more (5)

End of Block: Project logistics

---

Start of Block: General feedback

**Q4.1 Next, we would like to learn about any issues that made sampling difficult for you.**

---

Q4.2 Was there any week in which you were unable to conduct sampling for this project?

Yes (5)

No (6)

---

*Display This Question:*

*If Was there any week in which you were unable to conduct sampling for this project? = Yes*

Q4.3 Which of the following factors caused you to miss sampling? Please choose all that apply.

I was out of town. (2)

I was in town but too busy to conduct sampling. (3)

The weather was bad. (4)

I was ill or caring for an ill family member/friend. (5)

Collecting samples was physically challenging. (6)

I lost interest in the project. (7)

Other (please specify): (8) \_\_\_\_\_

---

Q4.4 As you know, sampling tasks for each visit to the beach included the following: taking at least 5 salinity measurements, 5 color measurements, and 5 GPS locations, and dropping off a water sample and data sheet at a drop-off location. Was there any day that you went to the beach to conduct sampling but were unable to complete all these sampling tasks?

- No: I completed all sampling tasks each time I went to the beach. (6)
  - Yes: I could not complete all sampling tasks because of GPS/phone malfunction. (1)
  - Yes: I could not complete all sampling tasks because of bad weather. (2)
  - Yes: I could not complete all sampling tasks because sampling was physically challenging. (3)
  - Yes: I could not complete all sampling tasks because I did not have enough time. (4)
  - Yes: I could not complete all sampling tasks for other reasons (please describe briefly): (5) \_\_\_\_\_
- 

Q4.5

Did you have any difficulty with dropping off samples at the designated locations?

- Yes (1)
  - No (2)
- 

*Display This Question:*

*If Did you have any difficulty with dropping off samples at the designated locations? = Yes*

Q4.6

Please describe the difficulty you had with dropping off samples:

\_\_\_\_\_

Start of Block: Experience participating

**Q5.1 Next, we would like to learn about other aspects of your experience participating in this project. Even if you provided similar information to us previously, it is important for us to obtain your feedback now that we are at the end of the project. Please do your best to provide accurate responses. This information is important! Thank you!**

**For each of the following statements, please indicate how strongly you agree or disagree, with respect to your experience as a participant in the Stanford Beach Project.**

-----

Q5.2

By participating in this project, I feel I have done something for a cause I believe in.

- Strongly disagree (1)
  - Somewhat disagree (2)
  - Neither agree nor disagree (3)
  - Somewhat agree (4)
  - Strongly agree (5)
-

Q5.3

By participating in this project, I have contributed to a worthwhile effort.

- Strongly disagree (1)
  - Somewhat disagree (2)
  - Neither agree nor disagree (3)
  - Somewhat agree (4)
  - Strongly agree (5)
- 

Q5.4 By participating in this project, I have contributed to protecting coastal water quality.

- Strongly disagree (1)
  - Somewhat disagree (3)
  - Neither agree nor disagree (4)
  - Somewhat agree (5)
  - Strongly agree (7)
-



Q5.5 By participating in this project, I have gained a better understanding of beach water quality issues.

- Strongly disagree (1)
  - Somewhat disagree (2)
  - Neither agree nor disagree (3)
  - Somewhat agree (4)
  - Strongly agree (5)
- 

Q5.6  
By participating in this project, I have gained skills in making water quality measurements.

- Strongly disagree (1)
  - Somewhat disagree (2)
  - Neither agree nor disagree (3)
  - Somewhat agree (4)
  - Strongly agree (5)
-

Q5.7

Participating in this project has been a good activity to do with my children.

- Strongly disagree (1)
  - Somewhat disagree (2)
  - Neither agree nor disagree (3)
  - Somewhat agree (4)
  - Strongly agree (5)
  - Not applicable to my participation in this study (6)
- 

Q5.8 Just a few more statements about your experience with this project.

Please indicate how strongly you agree or disagree with each of the following statements about your participation in this project.

---

Q5.9

Participating in this project has been an opportunity to spend time with people I care about.

- Strongly disagree (1)
  - Somewhat disagree (2)
  - Neither agree nor disagree (3)
  - Somewhat agree (4)
  - Strongly agree (5)
-

Q5.10

Participating in this project has been enjoyable.

- Strongly disagree (1)
  - Somewhat disagree (2)
  - Neither agree nor disagree (3)
  - Somewhat agree (4)
  - Strongly agree (5)
- 

Q5.11

Participating in this project has enabled me to meet people with interests similar to mine.

- Strongly disagree (1)
  - Somewhat disagree (2)
  - Neither agree nor disagree (3)
  - Somewhat agree (4)
  - Strongly agree (5)
-

Q5.12 Participating in this project has provided social time.

- Strongly disagree (1)
  - Somewhat disagree (2)
  - Neither agree nor disagree (3)
  - Somewhat agree (4)
  - Strongly agree (5)
- 

Q5.13 By participating in this project, I have learned something new about how rivers and creeks impact beach water quality.

- Strongly disagree (1)
  - Somewhat disagree (2)
  - Neither agree nor disagree (3)
  - Somewhat agree (4)
  - Strongly agree (5)
-

Q5.14 Volunteering with this project has strengthened my professional resume.

- Strongly disagree (1)
  - Somewhat disagree (2)
  - Neither agree nor disagree (3)
  - Somewhat agree (4)
  - Strongly agree (5)
- 

Q5.15 If you had the opportunity to participate with a similar beach project in the future, how likely do you think it is that you would volunteer again?

- Extremely unlikely (4)
- Somewhat unlikely (3)
- Somewhat likely (2)
- Extremely likely (1)

End of Block: Experience participating

---

Start of Block: Place attachment

Q6.1 **Almost done!**

**We'd like to understand your perceptions of the beach where you collected samples for this study, [\\${Q2.4/ChoiceGroup/SelectedChoices}](#). Some of these statements may seem similar to each another, but please do your best to provide accurate responses. This information is important!**

**Please indicate the degree to which you agree or disagree with the following statements, from 'Strongly disagree' to 'Strongly agree'.**

---

Q6.2 [\\${Q2.4/ChoiceGroup/SelectedChoices}](#) is the best place for the things I like to do at the beach.

- Strongly disagree (1)
  - Somewhat disagree (2)
  - Neither agree nor disagree (3)
  - Somewhat agree (4)
  - Strongly agree (5)
- 

Q6.3 [\\${Q2.4/ChoiceGroup/SelectedChoices}](#) is very special to me.

- Strongly disagree (1)
  - Somewhat disagree (2)
  - Neither agree nor disagree (3)
  - Somewhat agree (4)
  - Strongly agree (5)
- 

Q6.4 I am very attached to [\\${Q2.4/ChoiceGroup/SelectedChoices}](#).

- Strongly disagree (1)
- Somewhat disagree (2)
- Neither agree nor disagree (3)
- Somewhat agree (4)
- Strongly agree (5)

---

Q6.5 I feel [\\${Q2.4/ChoiceGroup/SelectedChoices}](#) is a part of me.

- Strongly disagree (1)
  - Somewhat disagree (2)
  - Neither agree nor disagree (3)
  - Somewhat agree (4)
  - Strongly agree (5)
- 

Q6.6 I get more satisfaction out of visiting [\\${Q2.4/ChoiceGroup/SelectedChoices}](#) than any other beach.

- Strongly disagree (1)
  - Somewhat disagree (2)
  - Neither agree nor disagree (3)
  - Somewhat agree (4)
  - Strongly agree (5)
- 

Q6.7 I identify strongly with [\\${Q2.4/ChoiceGroup/SelectedChoices}](#).

- Strongly disagree (1)
- Somewhat disagree (2)
- Neither agree nor disagree (3)
- Somewhat agree (4)
- Strongly agree (5)

---

Q6.8 No other place can compare with [\\${Q2.4/ChoiceGroup/SelectedChoices}](#).

- Strongly disagree (1)
  - Somewhat disagree (2)
  - Neither agree nor disagree (3)
  - Somewhat agree (4)
  - Strongly agree (5)
- 

Q6.9 The activities I can do at [\\${Q2.4/ChoiceGroup/SelectedChoices}](#) I would enjoy just as much at a similar beach.

- Strongly disagree (1)
- Somewhat disagree (2)
- Neither agree nor disagree (3)
- Somewhat agree (4)
- Strongly agree (5)

**End of Block: Place attachment**

---

**Start of Block: Water quality rating**

**Q7.1 Final section!**

---



Q7.2 How would you rate the water quality at  $\{Q2.4/ChoiceGroup/SelectedChoices\}$ ?

- Not good (1)
  - Moderately good (2)
  - Very good (3)
- 

Q7.3 We sent you and other project participants update emails every two weeks during the course of the project. Each message included a web link where you could see a summary of data collected in the preceding two weeks. The summary included information about salinity and flow measurements, as well as bacteria levels.

Before completing this survey, were you aware that web links to these data summaries were provided to project participants?

- No (1)
  - Yes (2)
- 

*Display This Question:*

*If We sent you and other project participants update emails every two weeks during the course of the... = Yes*

Q7.4 About how many of these data summaries did you personally look at?

- None (1)
- 1 (2)
- 2 (3)
- 3 (4)
- 4 (5)
- 5 (6)
- 6 (7)
- Other (please specify): (8) \_\_\_\_\_

---

*Display This Question:*

*If About how many of these data summaries did you personally look at? = 1*  
*Or About how many of these data summaries did you personally look at? = 2*  
*Or About how many of these data summaries did you personally look at? = 3*  
*Or About how many of these data summaries did you personally look at? = 4*  
*Or About how many of these data summaries did you personally look at? = 5*  
*Or About how many of these data summaries did you personally look at? = 6*  
*Or About how many of these data summaries did you personally look at? = Other (please specify):*

Q7.5 What effect did reviewing the data summary/ies have on your experience as a project participant?

- The data summary/ies worsened my experience a great deal. (2)
- The data summary/ies worsened my experience somewhat. (3)
- The data summary/ies had no effect on my experience. (6)
- The data summary/ies improved my experience somewhat. (4)
- The data summary/ies improved my experience a great deal. (5)

End of Block: Water quality rating

---
